# Supplementary material for: Coenzyme Q10 attenuates platelet integrin αIIbβ3 signaling and platelet hyper-reactivity in ApoE-deficient mice
Source: Royal Society of Chemistry journal article supplement (doi:10.1039/c9fo01686d), 2019-10-26
Supplement: c9fo01686d1.pdf [file c9fo01686d1.pdf]

### Supplementary information

**Table S1. Primer sequences used for qRT-PCR.**

| genes          | primer  | Sequence                             |
|----------------|---------|--------------------------------------|
| TNF $\alpha$   | Forward | 5'-CTG AAC TTC GGG GTG ATC GG-3'     |
|                | Reverse | 5'-GGC TTG TCA CTC GAA TTT TGA GA-3' |
| IFN $\gamma$   | Forward | 5'-CTG CTG ATG GGA GGA GAT GT-3'     |
|                | Reverse | 5'-TTT GTC ATT CGG GTG TAG TCA-3'    |
| IL-6           | Forward | 5'-CTG CAA GAG ACT TCC ATC CAG-3'    |
|                | Reverse | 5'-AGT GGT ATA GAC AGG TCT GTT GG-3' |
| $\beta$ -actin | Forward | 5'-TAG GCG GAC TGT TAC TGA GC-3'     |
|                | Reverse | 5'-TGC TCC AAC CAA CTG CTG TC-3'     |

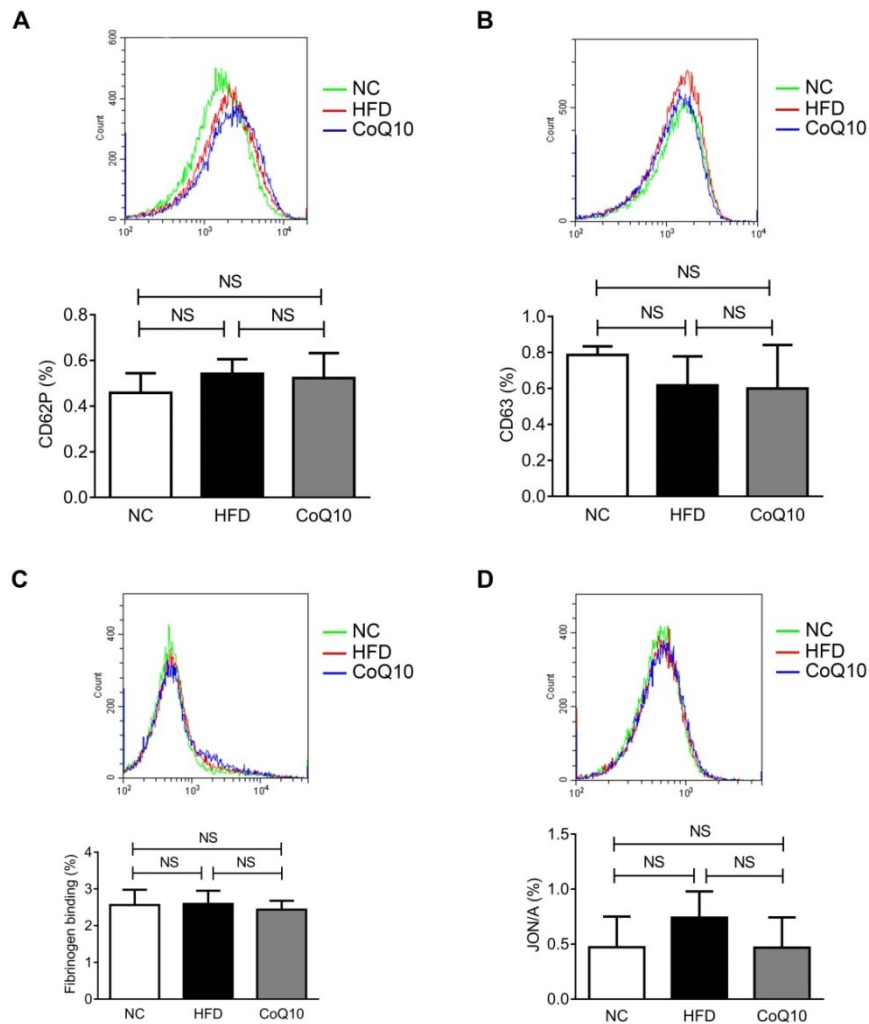

**Figure S1. CoQ10 supplementation does not affect platelet surface CD62P or CD63 expression as well as fibrinogen or JON/A binding to unstimulated platelets in ApoE<sup>-/-</sup> mice. (A-D)** Gel-filtered platelets are prepared from NC, HFD or CoQ10 mice. Platelet surface expression of CD62P (**A**, n=6) and CD63 (**B**, n=3) in resting platelets were analyzed by flow cytometry. Soluble FITC-labeled fibrinogen (**C**) or PE-labeled JON/A (**D**) binding to resting platelets (no agonist activation) were analyzed by flow cytometry (n=6). Data are expressed as the means  $\pm$  SEM. Statistical significance is assessed by ANOVA followed by the Newman-Keuls test for multiple comparisons. NS, not significant difference.

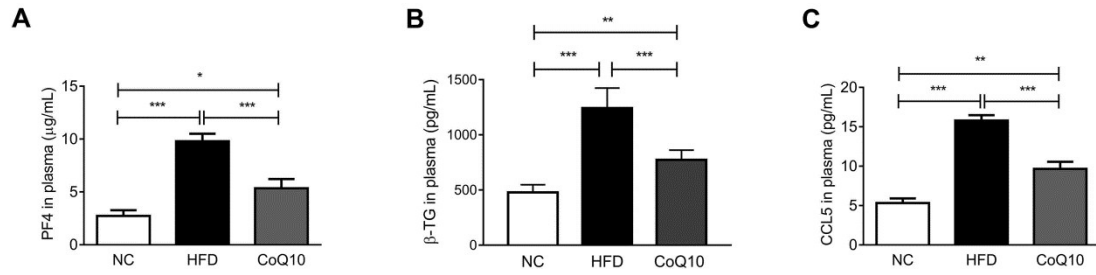

**Figure S2. CoQ10 supplementation decreases plasma levels of PF4, β-TG and CCL5 in ApoE<sup>-/-</sup> mice.** The plasma levels of PF4 (A), β-TG (B) and CCL5 (C) in ApoE<sup>-/-</sup> mice after 12-week intervention are determined (n=5). Data are expressed as the means ± SEM. \**P* < 0.05, \*\**P* < 0.01 and \*\*\**P* < 0.001 as assessed by ANOVA followed by the Newman–Keuls test for multiple comparisons.

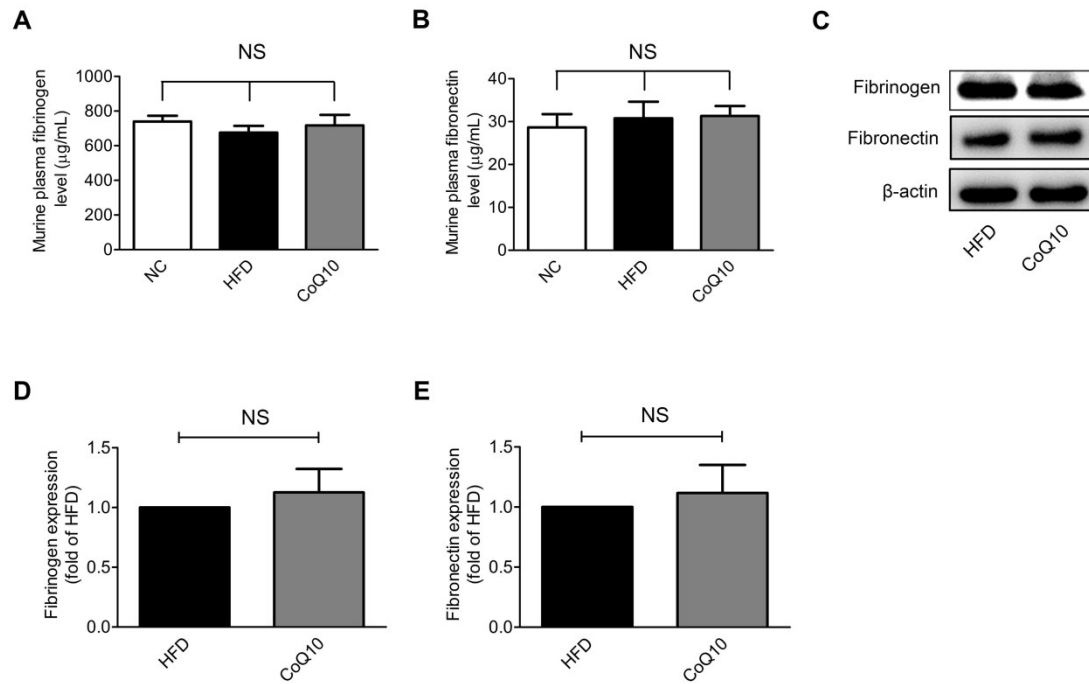

**Figure S3. CoQ10 supplementation does not affect plasma levels and platelet expression levels of Fg and fibronectin in ApoE<sup>-/-</sup> mice.** (A-B) Plasma levels of Fg (A) and fibronectin (B) in ApoE<sup>-/-</sup> mice following 12-week feeding are determined by ELISA (n=10). (C-E) Platelet lysates from HFD or CoQ10-supplemented ApoE<sup>-/-</sup> mice are analyzed by Western blotting using a specific antibody against Fg (D), or fibronectin (E). Representative immunoblots (C) are presented (n=3). All data are expressed as the means ± SEM. Statistical significance is determined by ANOVA followed by the Newman–Keuls test for multiple comparisons in A and B, and by using unpaired *t*-tests in D and E. NS, not significant difference.

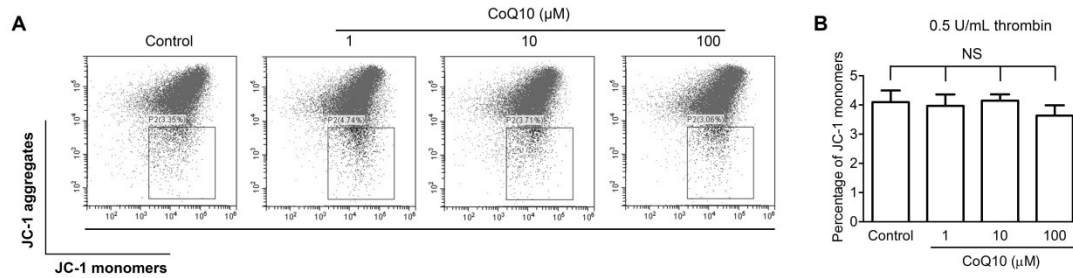

**Figure S4. CoQ10 does not significantly alter platelet mitochondrial membrane potential ( $\Delta\psi_m$ ) in human platelets *in vitro*.** Gel-filtered human platelets were pre-incubated with CoQ10 (1, 10, or 100  $\mu\text{M}$ ) or vehicle control (DMSO) for 50 min, and then activated by 0.5 U/mL thrombin for 2 min. JC-1 was used to assess the dissipation of the  $\Delta\psi_m$  by flow cytometry. Representative images (**A**) and summary data (**B**) were shown (n=3). Data are expressed as the means  $\pm$  SEM. Statistical significance is determined by ANOVA followed by the Newman–Keuls test for multiple comparisons. NS, not significant difference.

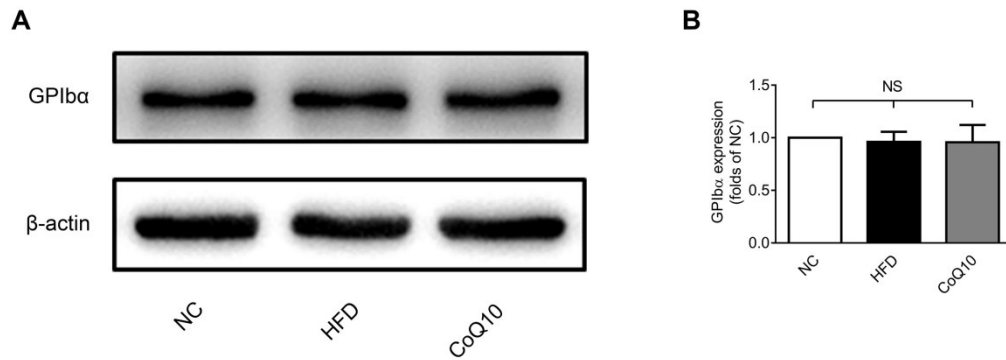

**Figure S5. CoQ10 supplementation does not affect platelet expression levels of GPIIb/IIIa in ApoE<sup>-/-</sup> mice.** Platelet lysates from NC, HFD or CoQ10-supplemented ApoE<sup>-/-</sup> mice are analyzed by Western blotting using a specific antibody against GPIIb/IIIa. Representative immunoblots (**A**) and summary data (**B**) are presented (n=3). Data are expressed as the means  $\pm$  SEM. Statistical significance is determined by ANOVA followed by the Newman–Keuls test for multiple comparisons. NS, not significant difference.

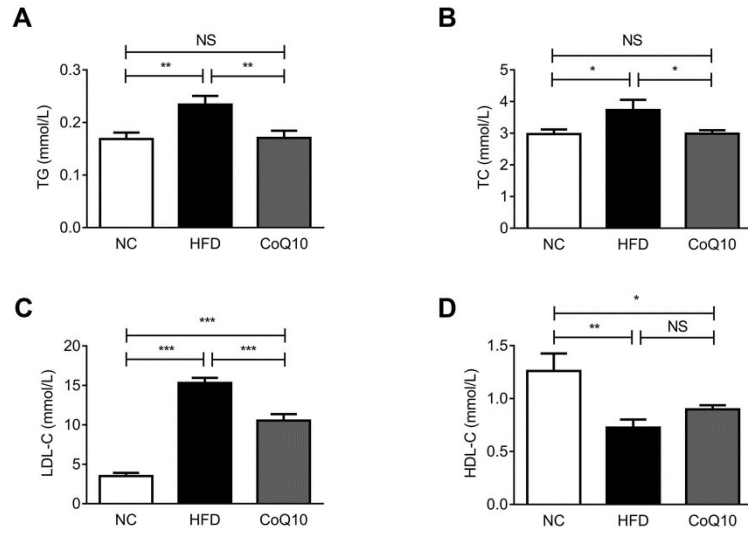

**Figure S6. CoQ10 supplementation improves plasma lipid profiles in *ApoE*<sup>-/-</sup> mice.** Plasma levels of triglyceride (TG) (A), total cholesterol (TC) (B), low density lipoprotein cholesterol (LDL-C) (C) and high density lipoprotein cholesterol (HDL-C) (D) are measured in NC, HFD or CoQ10-supplemented mice after 12-week intervention (n=10). Data are expressed as the means  $\pm$  SEM. \* $P < 0.05$ , \*\* $P < 0.01$  and \*\*\* $P < 0.001$  as assessed by ANOVA followed by the Newman–Keuls test for multiple comparisons. NS, not significant difference.

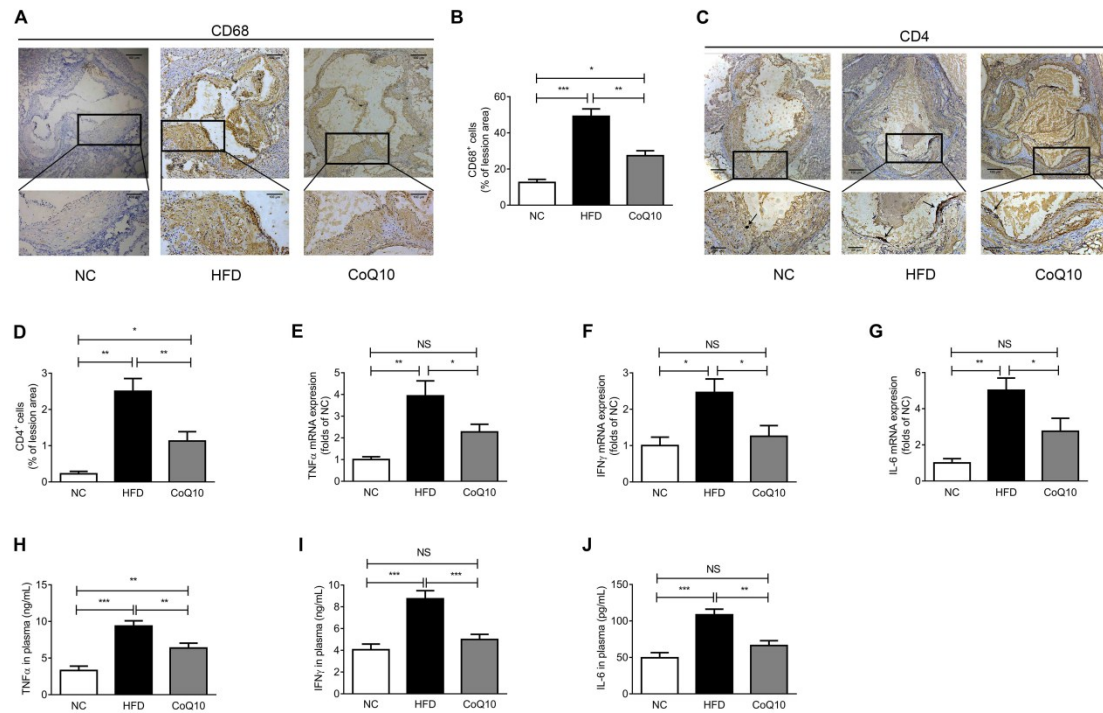

**Figure S7. CoQ10 supplementation decreases inflammatory responses in ApoE<sup>-/-</sup> mice.** (A-D) Representative images of CD68-stained (A) and CD4-stained (C) aortic sinus atherosclerotic lesions are presented and the mean stained areas of CD68 (B) and CD4 (D) in lesions are determined (n=5). Scale bars indicate 100  $\mu$ m. Overview (*upper*) and detailed view (*lower*) of the staining are given in A and C. CD4-positive areas are marked with arrows in C. (E-G) Relative mRNA expression of TNF $\alpha$  (E), IFN $\gamma$  (F), and IL-6 (G) in whole aortae from NC, HFD or CoQ10-supplemented ApoE<sup>-/-</sup> mice are shown after 12-week intervention (n=5). (H-J) The plasma levels of TNF $\alpha$  (H), IFN $\gamma$  (I), and IL-6 (J) from NC, HFD or CoQ10 mice are determined (n=5). Data are expressed as the means  $\pm$  SEM. \* $P$  < 0.05, \*\* $P$  < 0.01 and \*\*\* $P$  < 0.001 as assessed by ANOVA followed by the Newman-Keuls test for multiple comparisons. NS, not significant difference.
